# Supplementary material for: Tetraphenylethene-functionalized diketopyrrolopyrrole solid state emissive molecules: enhanced emission in the solid state and as a fluorescent probe for cyanide detection
Source: Royal Society of Chemistry journal article supplement (doi:10.1039/c6ra10073b), 2016-01-01
Supplement: c6ra10073b1.pdf [file c6ra10073b1.pdf]

**Tetraphenylethene -functionalized diketopyrrolopyrrole solid state  
emissive molecules: enhanced emission in the solid state and as a  
fluorescent probe for cyanide detection**

Lingyun Wang <sup>a\*</sup>, Linhui Zhu<sup>a</sup>, Lin Li <sup>b\*</sup>, Derong Cao <sup>a</sup>

<sup>a</sup> School of Chemistry and Chemical Engineering, State Key Laboratory of Luminescent Materials and Devices, South China University of Technology, Guangzhou, China, 510641

<sup>b</sup> School of Food Science and Engineering, South China University of Technology, Guangzhou, China, 510641

\*Corresponding author: Tel. +86 20 87110245; fax: +86 20 87110245. E-mail:

[lingyun@scut.edu.cn](mailto:lingyun@scut.edu.cn); [felinli@scut.edu.cn](mailto:felinli@scut.edu.cn)

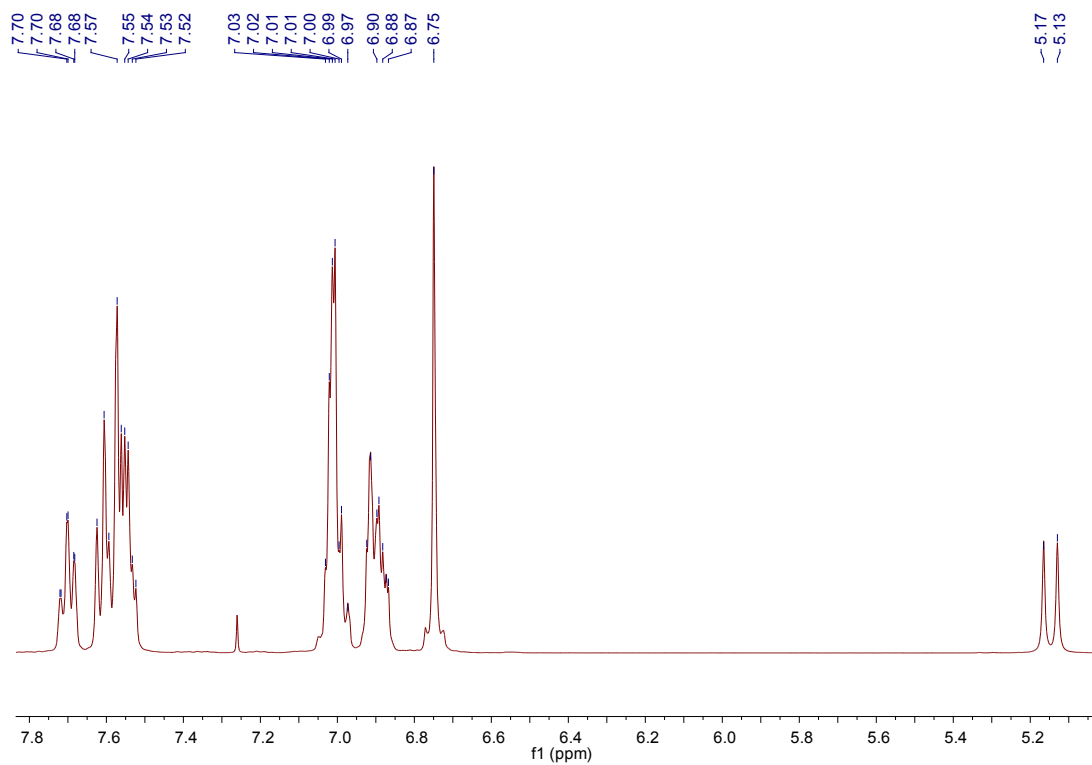

Fig.S1  $^1\text{H}$  NMR spectrum of compound **7** in  $\text{CDCl}_3$ .

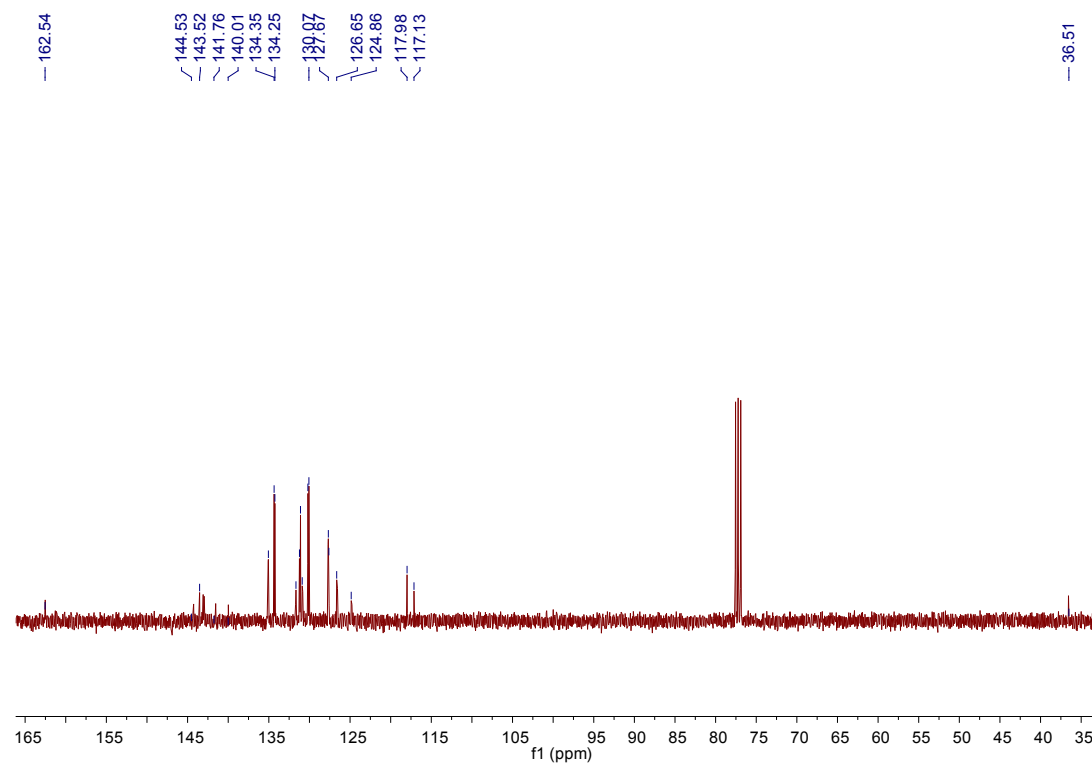

Fig.S2  $^{13}\text{C}$  NMR spectrum of compound **7** in  $\text{CDCl}_3$ .

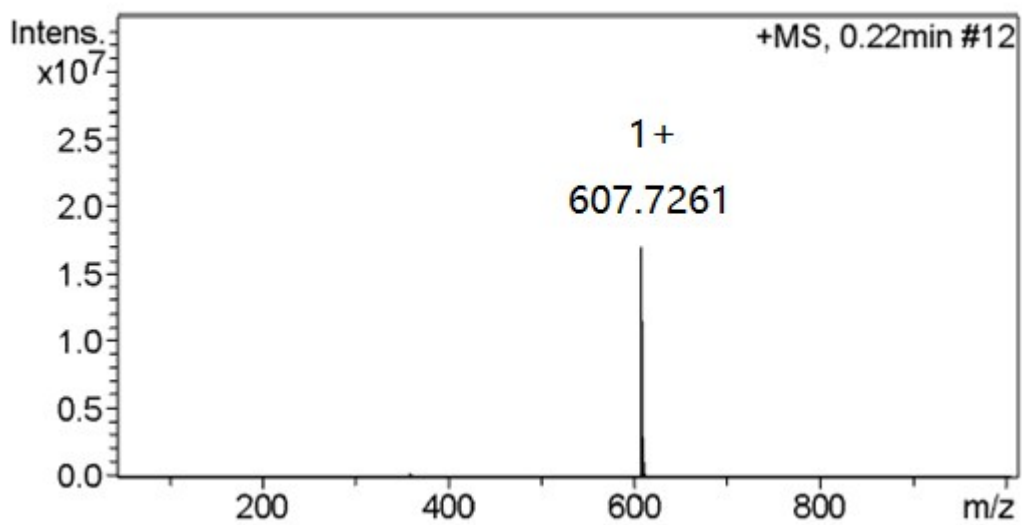

Fig.S3 HRMS spectrum of compound 7.

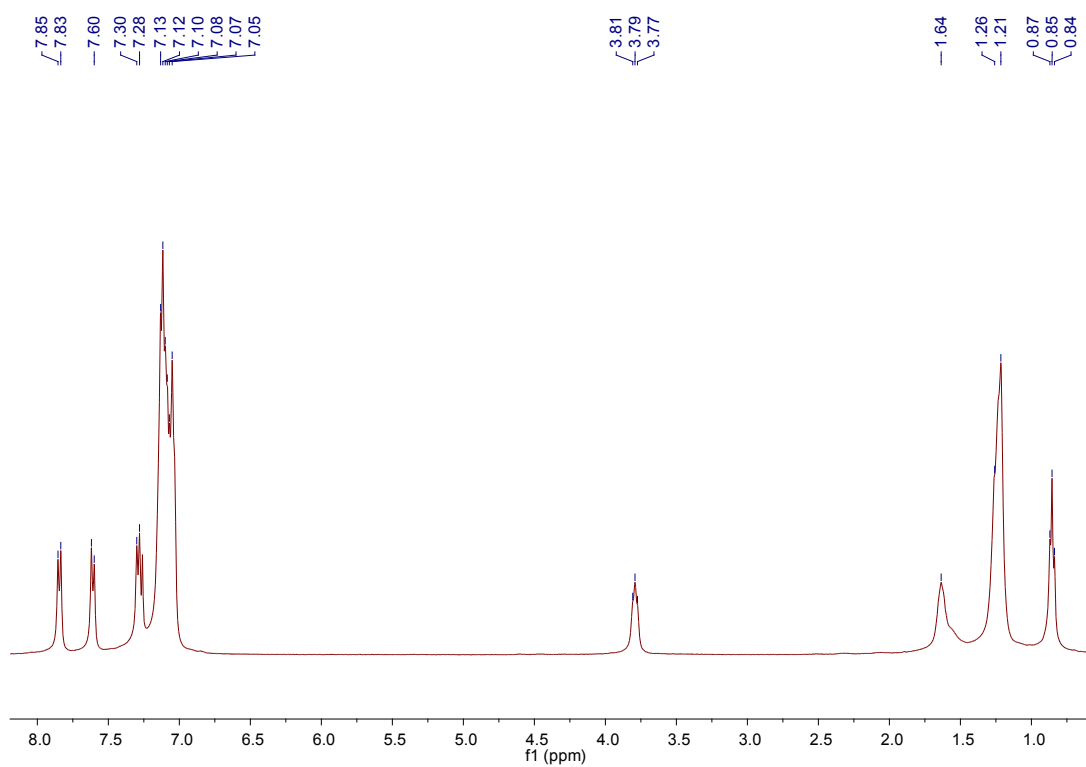

Fig.S4 <sup>1</sup>H NMR spectrum of **DPP1** in CDCl<sub>3</sub>.

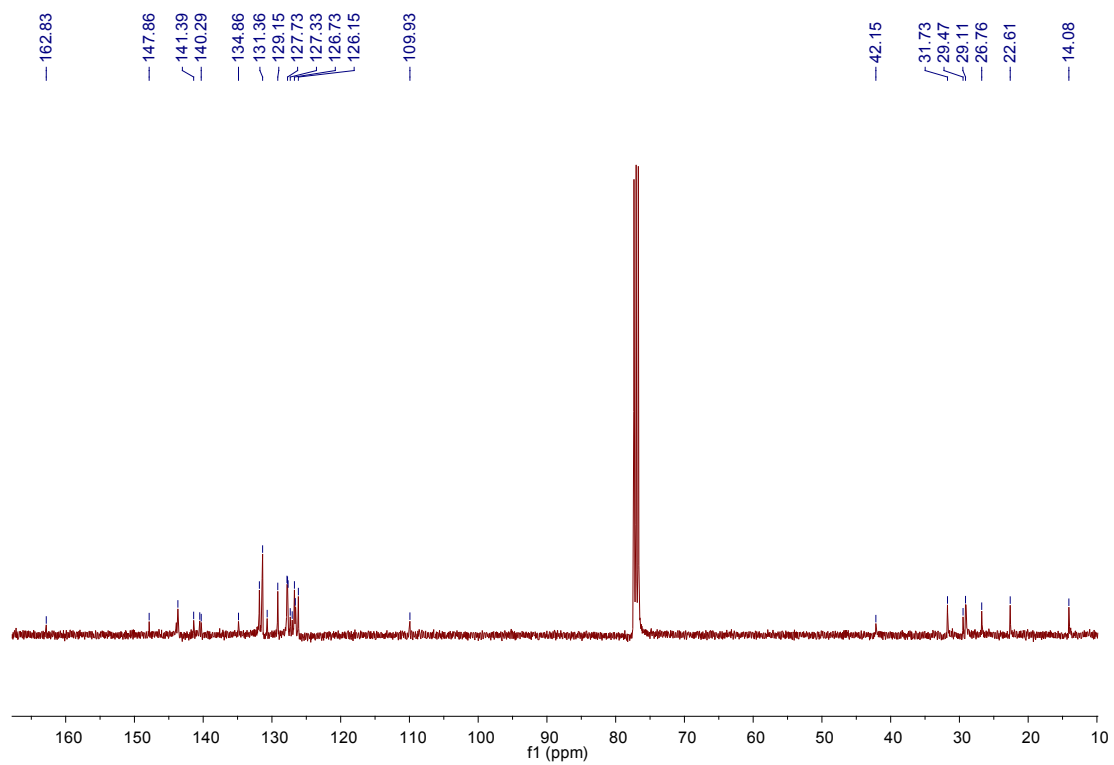

Fig.S5  $^{13}\text{C}$  NMR spectrum of **DPP1** in  $\text{CDCl}_3$ .

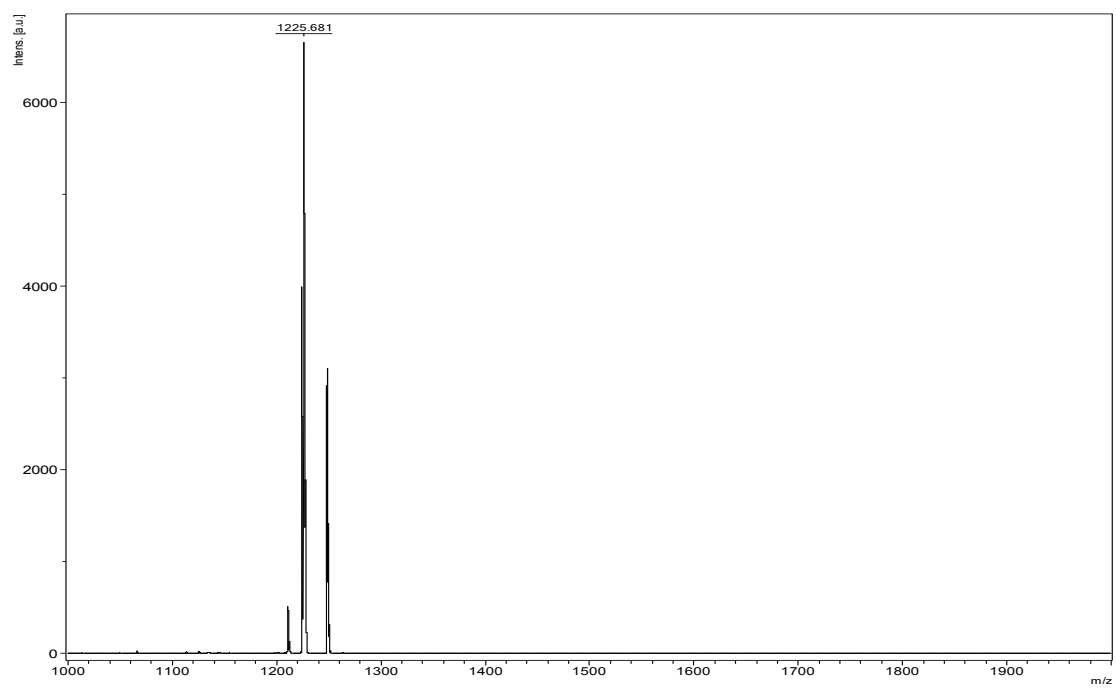

Fig.S6 HRMS spectrum of **DPP1**.

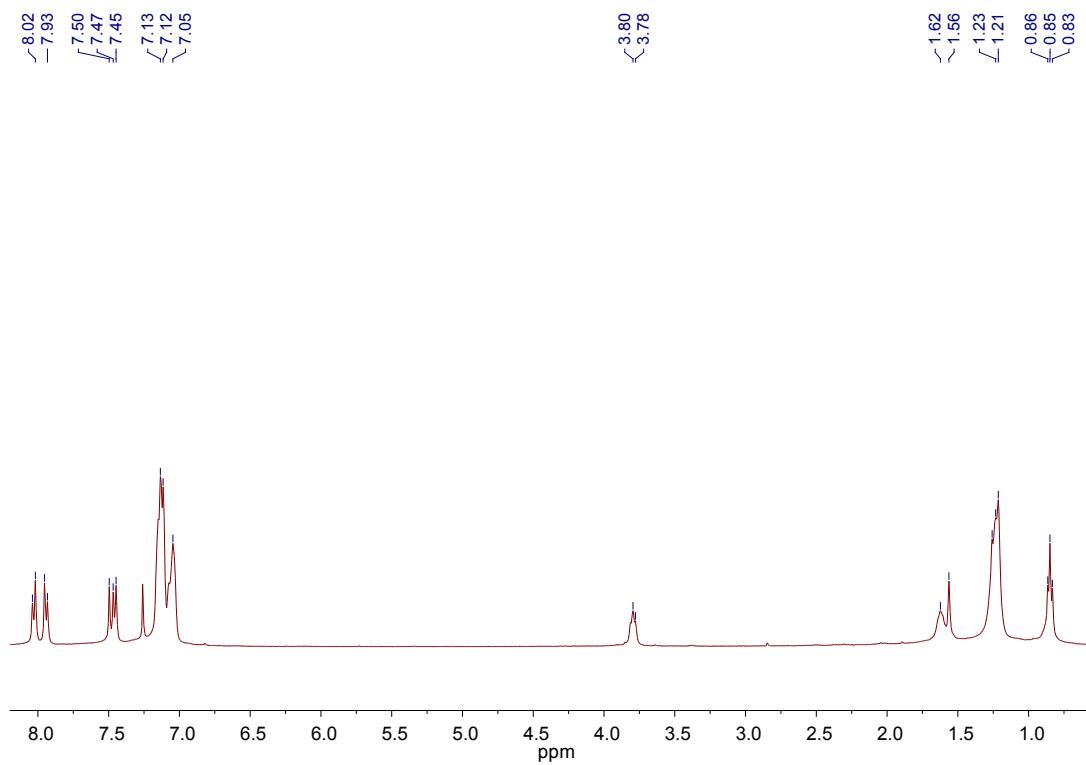

Fig.S7  $^1\text{H}$  NMR spectrum of **DPP2** in  $\text{CDCl}_3$ .

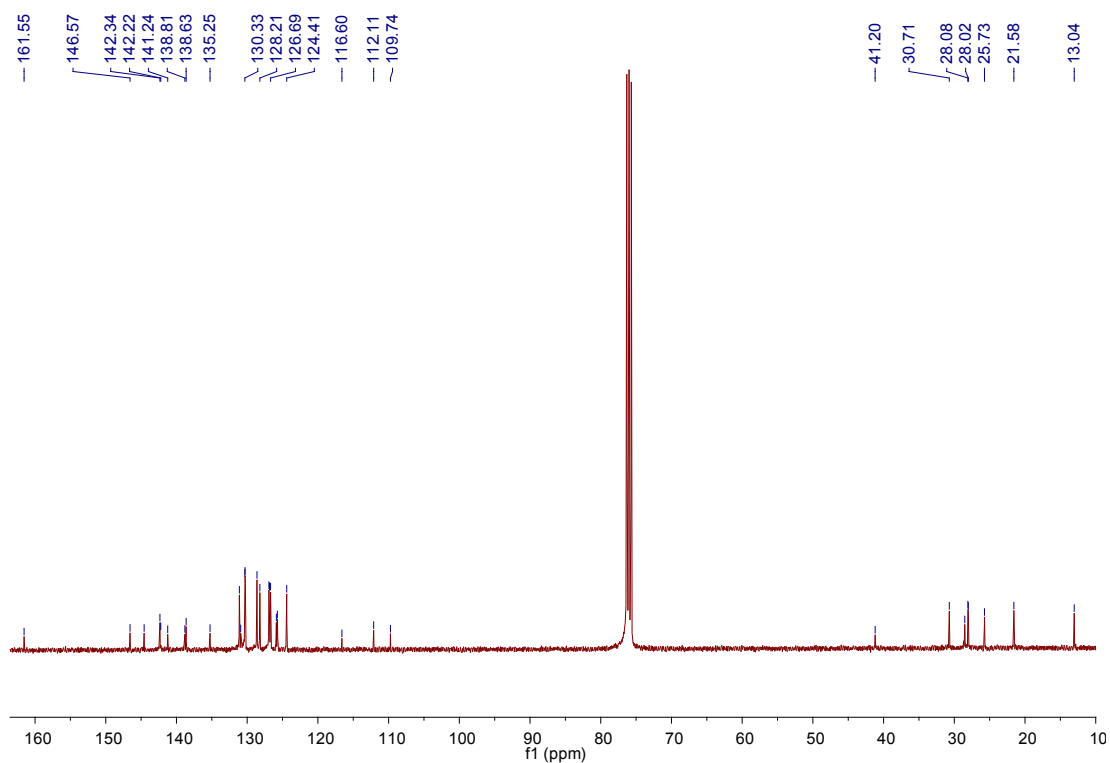

Fig.S8  $^{13}\text{C}$  NMR spectrum of **DPP2** in  $\text{CDCl}_3$ .

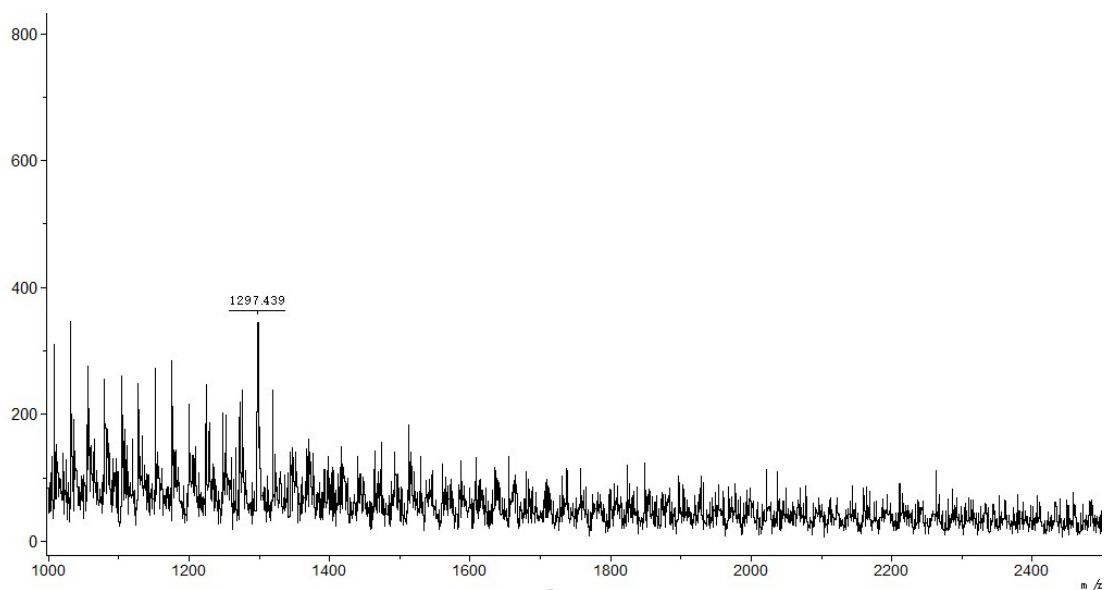

Fig.S9 HRMS spectrum of **DPP2**.

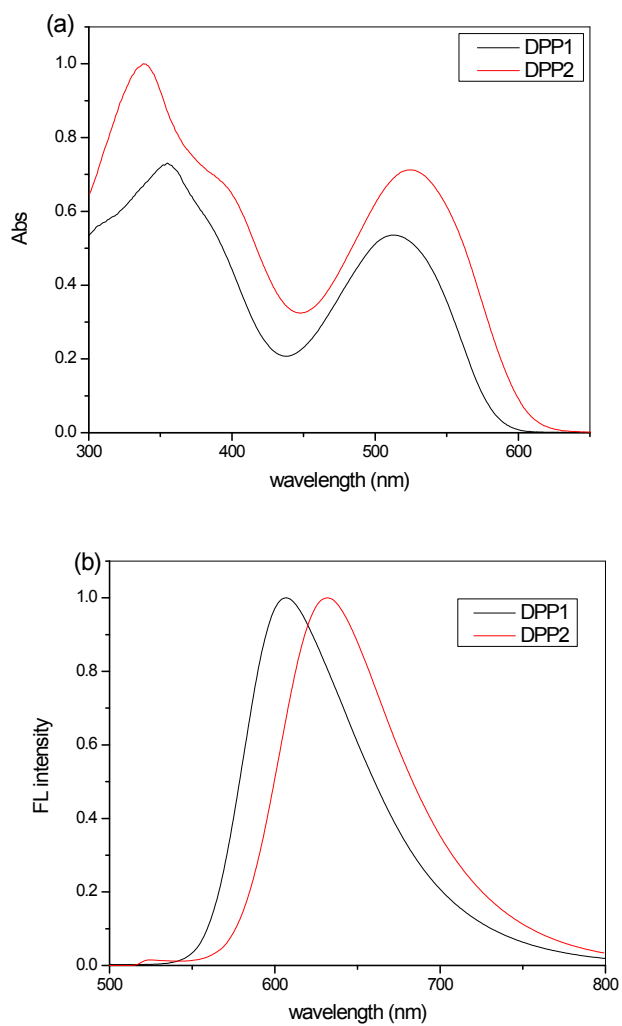

Fig.S10 (a) Normalized UV-vis and (b) photoluminescence (PL) spectra of **DPP1** and

**DPP2** in THF.

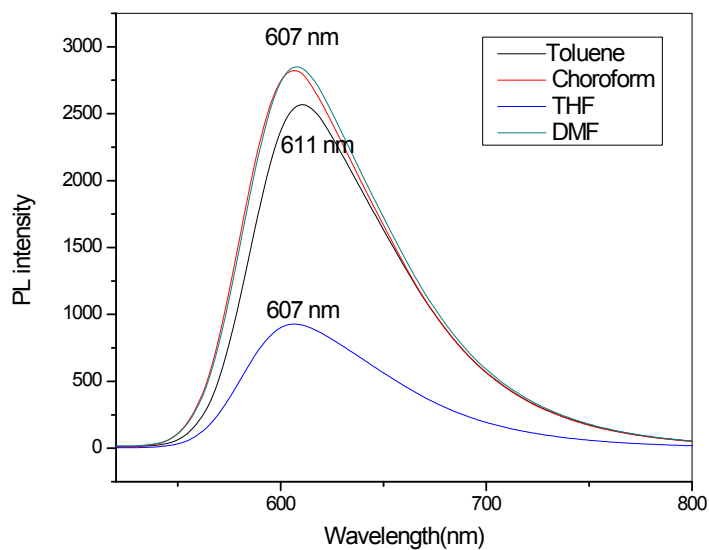

Fig.S11 The photoluminescence (PL) spectra of **DPP1** (10  $\mu$ M) in different solvents.

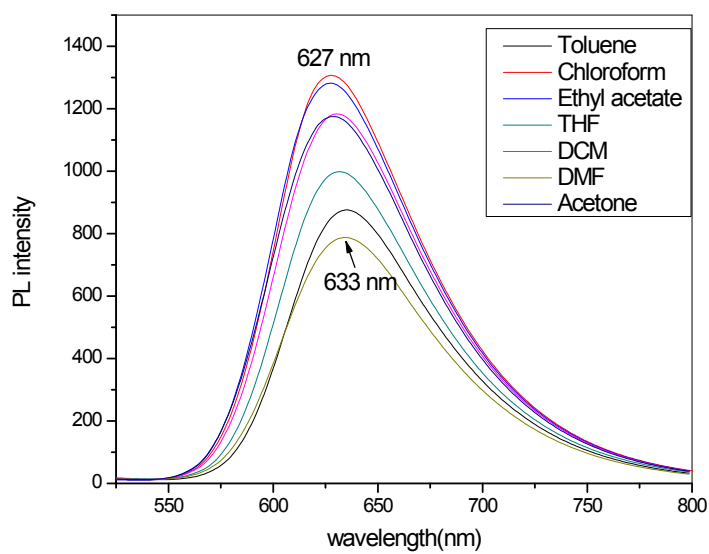

Fig.S12 The photoluminescence (PL) spectra of **DPP2** (10  $\mu$ M) in different solvents.

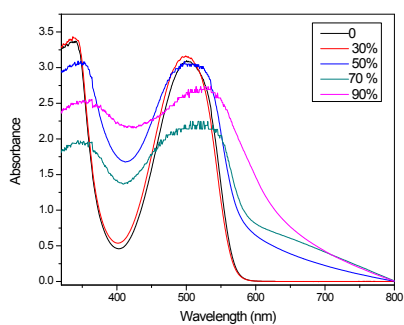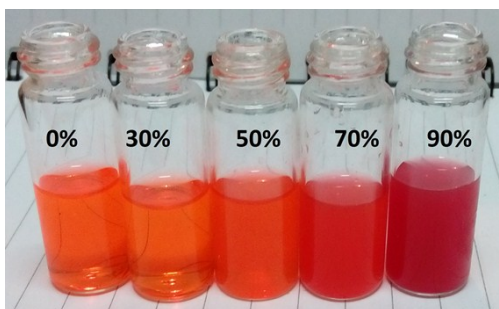

Fig.S13 The UV-vis spectra of **DPP1** (10  $\mu$ M) in THF/water.

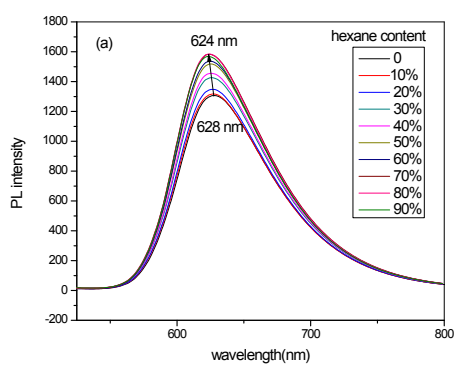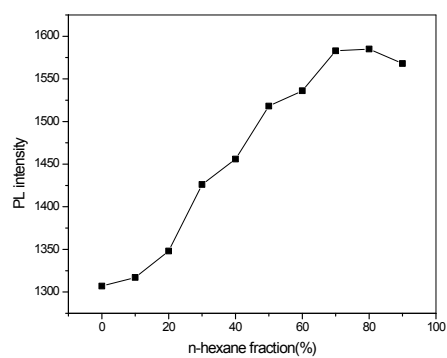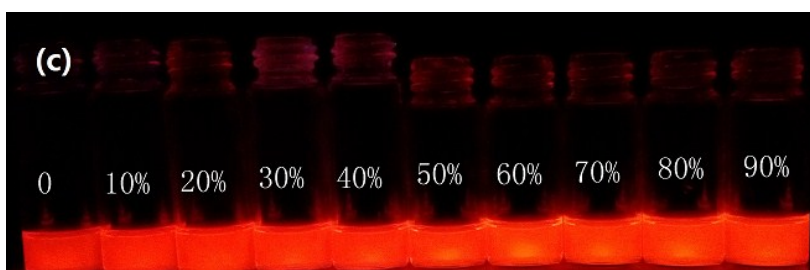

Fig. S14 (a) The photoluminescence (PL) spectra, (b) PL intensity vs  $f_h$  and (c) emission photographs of **DPP2** in  $\text{CHCl}_3$ /hexane mixtures with different  $f_h$  values.



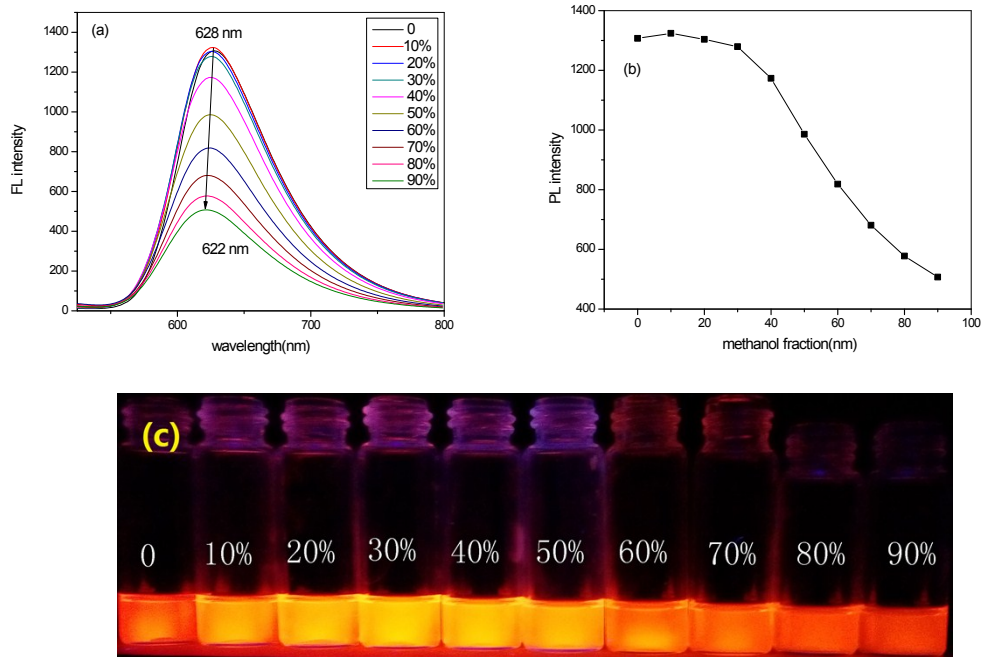

Fig.S15 (a) The photoluminescence (PL) spectra spectra, (b) PL intensity vs  $f_m$  and (c) emission photographs of **DPP2** in CHCl<sub>3</sub>/methanol mixtures with different  $f_m$  values.

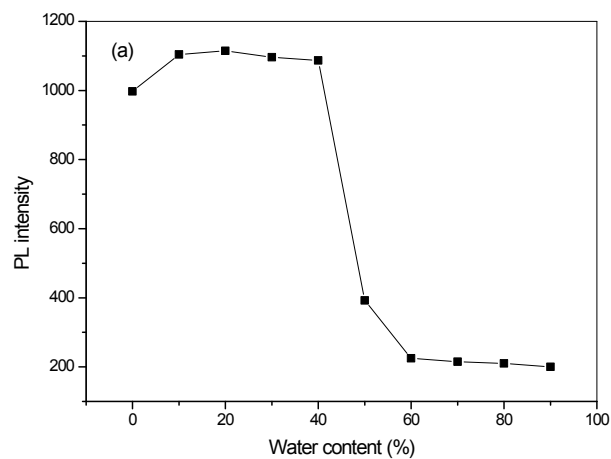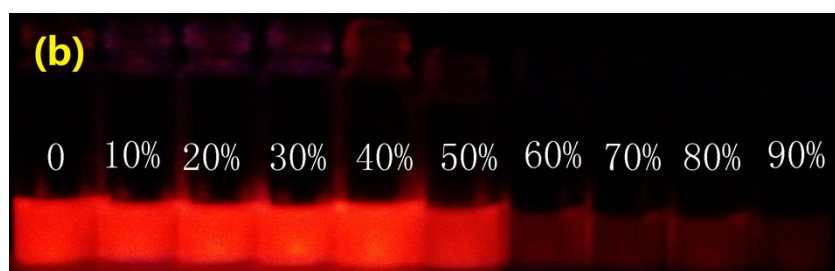

Fig.S16 (a) PL intensity vs  $f_w$  and (b) emission photographs of **DPP2** in THF/water mixtures with different  $f_w$  values.

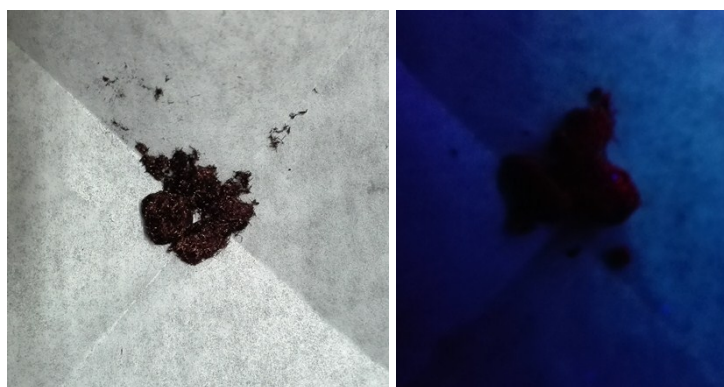

Fig. S17 The photographs of compound **4** in daylight (left) and under 365 nm excitation (right).

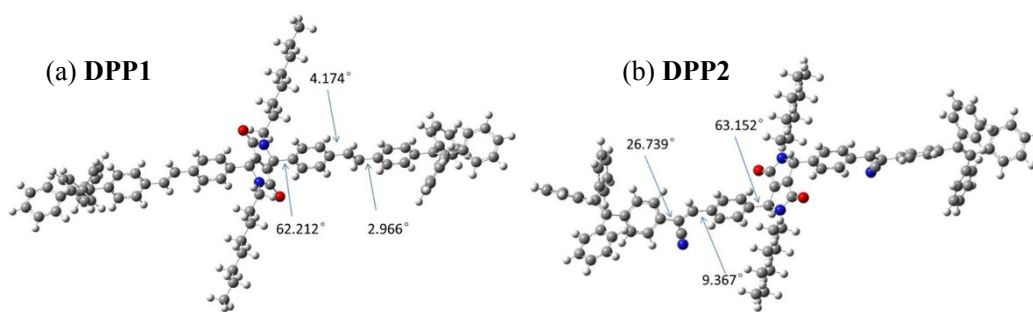

Fig.S18 The optimizations of the molecular geometry by theoretical calculation.

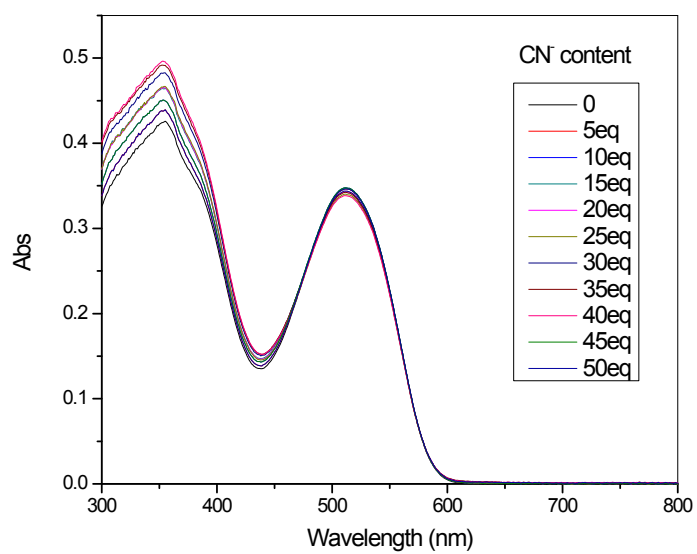

Fig. S19 UV-Vis spectral changes of **DPP1** in THF ( $10 \mu\text{M}$ ) with the increasing concentrations of cyanide anion.

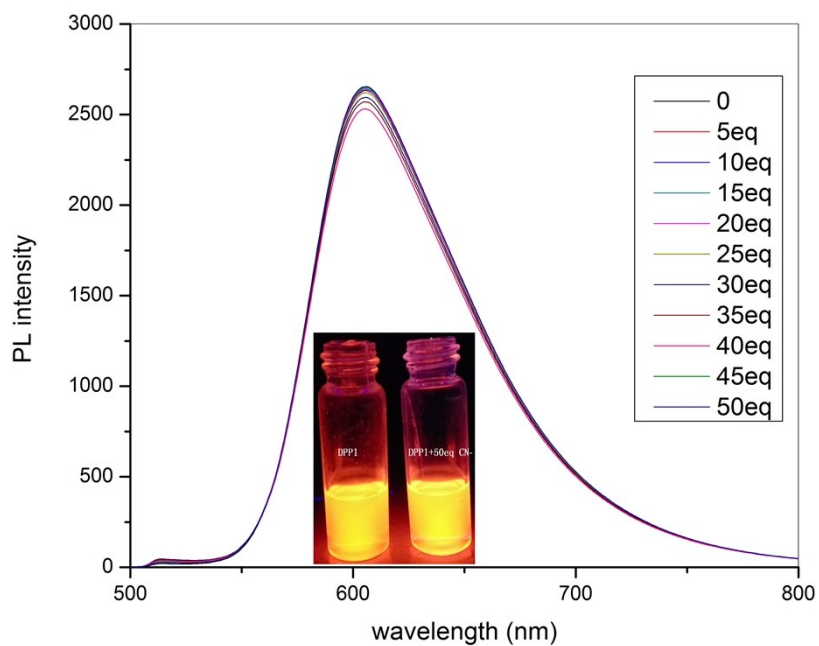

Fig. S20 The photoluminescence (PL) spectral changes of **DPP1** (10 μM) in THF with the increasing concentrations of CN<sup>-</sup> in THF under excitation at 510 nm.

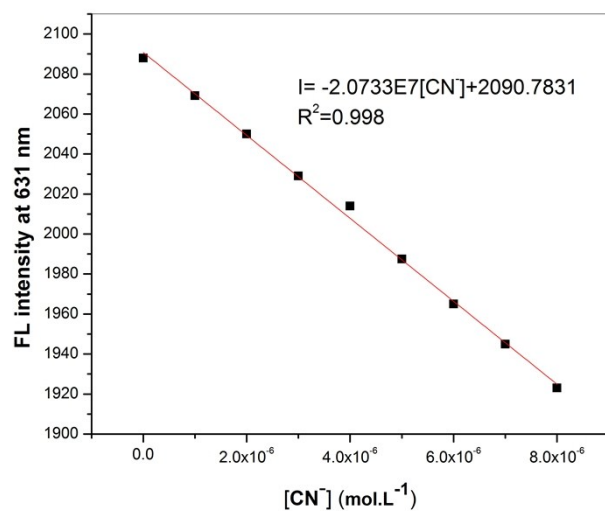

Fig.S21 The linear relation for concentration of CN<sup>-</sup> in the range of 1–8 μM.

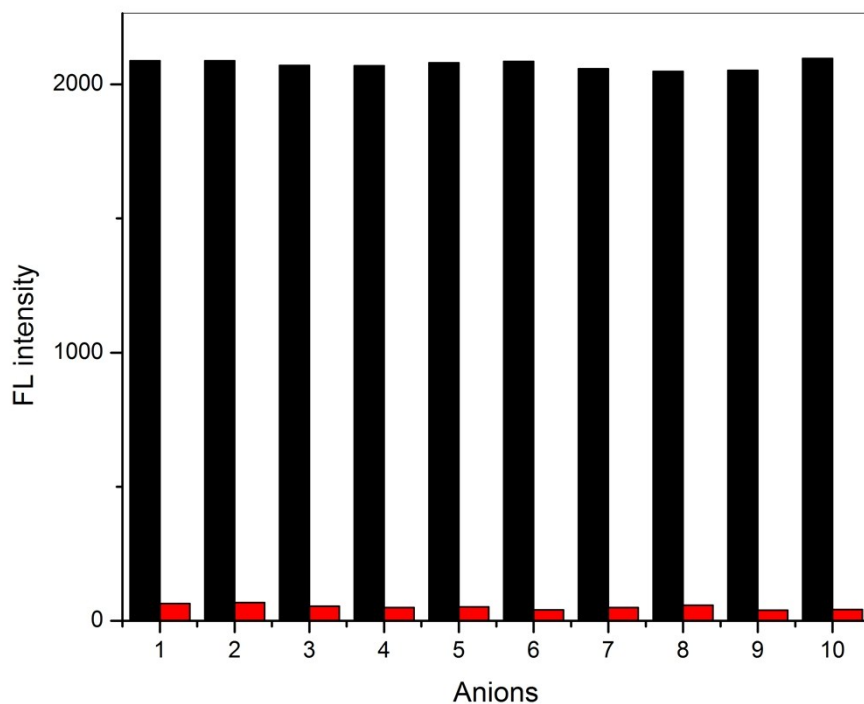

Fig. S22 Selectivity of **DPP2**. The black bars represent fluorescence intensity at 631nm of **DPP2** in THF in the presence of other anions (52 equiv). The red bars represent the fluorescence intensity that occurs upon the subsequent addition of 52 equiv of  $\text{CN}^-$  to the above solution. From 1 to 10, control,  $\text{F}^-$ ,  $\text{Cl}^-$ ,  $\text{Br}^-$ ,  $\text{I}^-$ ,  $\text{HSO}_4^-$ ,  $\text{H}_2\text{PO}_4^-$ ,  $\text{OAc}^-$ ,  $\text{NO}_3^-$  and  $\text{ClO}_4^-$ .

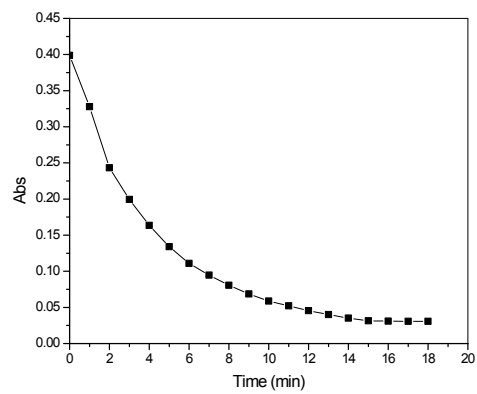

Fig. S23 Time-dependent absorption intensity of probe **DPP2** (10  $\mu\text{M}$ ) in THF at 525 nm in the presence of  $\text{CN}^-$  (24 equiv) at room temperature.
